## **Dissociable influences of reward and punishment on adaptive cognitive control**

Xiamin Leng\*, Debbie Yee, Harrison Ritz, Amitai Shenhav

Department of Cognitive, Linguistic, and Psychological Sciences,  
Carney Institute for Brain Science,  
Brown University, Providence, RI, USA

\*Correspondence should be addressed to Xiamin Leng ([xiamin\\_leng@brown.edu](mailto:xiamin_leng@brown.edu)).

## 1 **Abstract**

2 To invest effort into any cognitive task, people must be sufficiently motivated. Whereas  
3 prior research has focused primarily on how the cognitive control required to complete  
4 these tasks is motivated by the potential rewards for success, it is also known that  
5 control investment can be equally motivated by the potential negative consequence for  
6 failure. Previous theoretical and experimental work has yet to examine how positive and  
7 negative incentives differentially influence the manner and intensity with which people  
8 allocate control. Here, we develop and test a normative model of control allocation  
9 under conditions of varying positive and negative performance incentives. Our model  
10 predicts, and our empirical findings confirm, that rewards for success and punishment  
11 for failure should differentially influence adjustments to the evidence accumulation rate  
12 versus response threshold, respectively. This dissociation further enabled us to infer  
13 how motivated a given person was by the consequences of success versus failure.

14

## 15 **Author Summary**

16 From the school to the workplace, whether someone achieves their goals is determined  
17 largely by the mental effort they invest in their tasks. Recent work has demonstrated  
18 both why and how people adjust the amount of effort they invest in response to  
19 variability in the rewards expected for achieving that goal. However, in the real world,  
20 we are motivated both by the positive outcomes our efforts can achieve (e.g., praise)  
21 *and* the negative outcomes they can avoid (e.g., rejection), and these two types of  
22 incentives can motivate adjustments not only in the amount of effort we invest but also  
23 the *types* of effort we invest (e.g., whether to prioritize performing the task *efficiently* or

24 *cautiously*). Using a combination of computational modeling and a novel task that  
25 measures voluntary effort allocation under varying incentive conditions, we show that  
26 people should and do engage dissociable forms of mental effort in response to positive  
27 versus negative incentives. With increasing rewards for achieving their goal, they  
28 prioritize efficient performance, whereas with increasing penalties for failure they  
29 prioritize performing cautious performance. We further show that these dissociable  
30 strategies enable us to infer how motivated a given person was based on the positive  
31 consequences of success relative to the negative consequences of failure.

## 32 **Introduction**

33 People must regularly decide how much mental effort to invest in a task, and for how  
34 long. When doing so, they weigh the costs of exerting this effort against the potential  
35 benefits that would accrue as a result [1,2]. These benefits include not only the positive  
36 consequences of success (e.g., money or praise) but also the negative consequences  
37 of failure (e.g., criticism or rejection). Prior work suggests that people likely vary in the  
38 extent they are motivated by the prospect of achieving a positive outcome versus  
39 avoiding a negative outcome [3,4]. For example, some students study diligently to earn  
40 praise from their parents while others do so to avoid embarrassment. The overall  
41 salience of these incentives will determine when and how a given person decides to  
42 invest mental effort (i.e., engage relevant cognitive control processes [5], including  
43 when they choose to disengage from effortful tasks [6,7]). However, while a great deal  
44 is known about how people adjust cognitive control in response to varying levels of  
45 potential reward [5,8,9], much less is known about how they similarly adjust to varying  
46 levels of potential punishment, nor the types of control allocation strategies that are  
47 most adaptive under these two incentive conditions.

48

49 Previous research has examined how control allocation varies as a function of the  
50 reward for performing well on a task, such that participants generally perform better  
51 when offered a greater reward [10–14]. For instance, when earning rewards during a  
52 cognitive control task (e.g., Stroop) is contingent on both speed and accuracy,  
53 participants are faster and/or more accurate as potential rewards increase [11,15–17].  
54 While studies have examined how motivation to avoid negative outcomes influence

55 cognitive control [18–22], a challenge of interpreting these mixed behavioral patterns is  
56 that participants deploy a variety of behavioral strategies as potential punishments  
57 increase [22,23]. Past work has demonstrated that these strategies, such as increased  
58 task processing (e.g., attentional focus) or adjusting decision thresholds, can be linked  
59 to different forms of control adjustment (e.g., prioritizing speed versus accuracy; [24–  
60 27]). However, it remains unknown whether participants selectively deploy different  
61 forms of control adjustments when incentivized under distinct incentive regimes (i.e., to  
62 avoid poor performance versus achieve good performance).

63

64 Recent theoretical work helps to frame predictions regarding when and how people  
65 might vary their control allocation in response to different forms of incentives [1]. For  
66 instance, normative accounts of physical effort allocation have proposed that animals  
67 and humans vary the intensity of their effort (e.g., motor vigor) to maximize their net  
68 reward per unit time (reward rate [28–31]). We have recently extended this framework  
69 to describe how people determine the appropriate allocation of *cognitive control* in a  
70 given situation. Specifically, we have suggested that people select the amount and  
71 type(s) of cognitive control that maximize the overall rate of expected rewards, while  
72 minimizing expected effort costs. The difference between these two quantities, referred  
73 to as the Expected Value of Control (EVC), indexes the extent to which the benefits of  
74 control outweigh its costs [1,2,32] (see also [33]).

75

76 The EVC model has been successful at accounting for how people vary the intensity of  
77 a particular type of control (e.g., attention to a target stimulus/feature) to achieve greater

78 rewards [34,35]. However, limitations in existing data have prevented EVC from  
79 addressing how the *type* of control being allocated should depend on the type of  
80 incentive being varied. One limitation, noted above, is the dearth of research on how  
81 people adjust control to positive versus negative incentives. A second potential  
82 limitation is that most existing studies examine how performance varies over a fixed set  
83 of trials (e.g., 200 total trials completed over the course of an experiment). The maximal  
84 expected reward is determined by the number of trials in the task, which could limit the  
85 underlying drive to maximize reward rate. A stronger test of reward rate maximization,  
86 and one that is arguably more analogous to real-world effort allocation, would allow  
87 participants to perform as much or as little of the task as they like over a fixed duration  
88 [36], to tighten the link between reward rate and overall expected reward.

89  
90 In the current study, we developed a novel paradigm in which participants perform  
91 consecutive trials of a control-demanding task (the Stroop task) over a fixed time  
92 interval. We examined how the amount and type(s) of control allocated to this task  
93 varied under different incentive types (reward vs. punishment) and different magnitudes  
94 of those incentives (small vs. large). Across two experiments, participants demonstrated  
95 distinct patterns of task performance in the two incentive conditions: faster responses  
96 for increasing rewards, slower but more accurate responses for increasing punishment.  
97 We show that these patterns are consistent with normative predictions of a control  
98 allocation model that maximizes reward rate while minimizing effort costs. The model  
99 predicts that rewards versus punishments favor divergent control strategies: higher  
100 reward promotes faster information processing to maximize (correct) response rate,

101 whereas higher punishment promotes greater caution to minimize potential errors.

102 Within the framework of a drift diffusion model (DDM), our normative model predicts that  
103 participants will respond to increases in reward level by both increasing their evidence  
104 accumulation rate (drift rate) and lowering their response threshold, whereas they will  
105 respond to increases in punishment level by primarily increasing their threshold. Model  
106 fits to behavioral data across both studies confirmed these predictions.

107

108 Our model's ability to make divergent predictions about the influence of incentives on  
109 the *joint* allocation of two forms of control (i.e., across drift rate and threshold) enabled  
110 us to make further inferences based on each participant's unique behavioral profile.  
111 Specifically, by estimating how these DDM parameters varied together across  
112 conditions, we were able to infer how sensitive that participant might have been to  
113 reward and punishment to generate the pattern of behavior that they did. Collectively,  
114 this work demonstrates a compelling novel method for inferring variability in how people  
115 evaluate costs and benefits when deciding when and how much to allocate cognitive  
116 control.

117

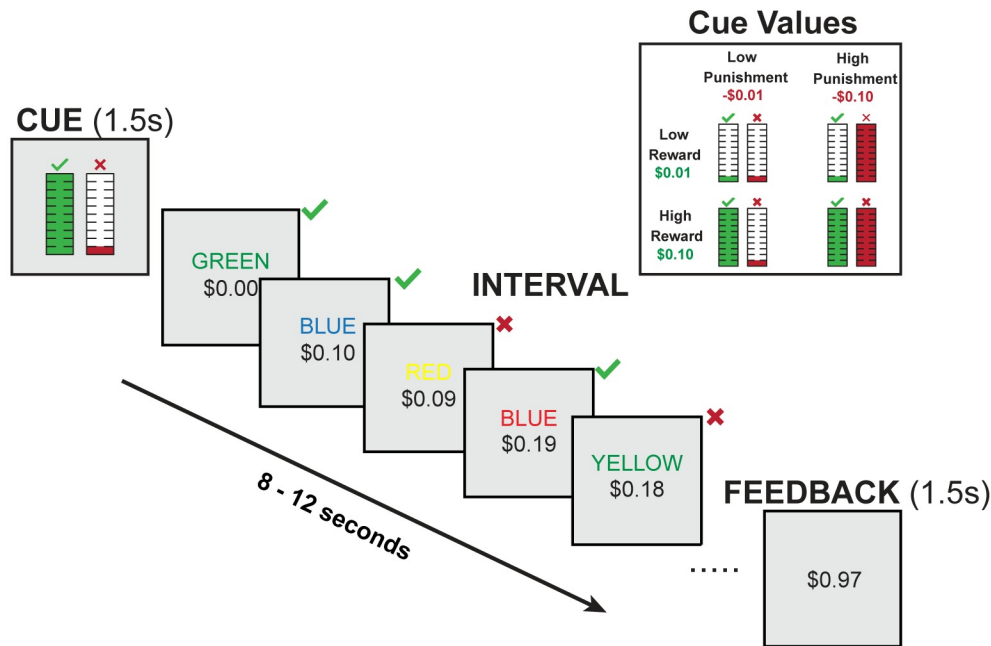

**Figure 1. Interval-Based Incentivized Cognitive Control Task.** At the start of each interval, a visual cue indicates the amount of reward (monetary gain) for correct responses and the penalty amount (monetary loss) for incorrect responses within that interval. Participants can complete as many Stroop trials as they want within that interval. The cumulative reward over a given interval is tracked at the bottom of the screen. Correct responses increase this value, while incorrect responses decrease this value. At the end of each interval, participants are told how much they earned. The upper right inset shows the cues across the four conditions.

## 118 **Results**

119 Participants (N=32) performed a task in which they were given fixed time intervals  
120 (between 8 and 12 seconds long) to perform as many trials as they wanted of a  
121 cognitively demanding task (Stroop task; Figure 1). They received monetary reward for



122 each correct response within a given interval, and incurred a monetary loss (penalty) for  
123 each incorrect response. The magnitude of reward and penalty (\$0.01 or \$0.10) were  
124 independently varied across intervals, and were cued prior to the start of each interval.

### 125 *Behavioral Performance*

126 We found that when participants were expecting a larger reward for each correct  
127 response, they completed more trials correctly in a given interval compared to when  
128 they were expecting smaller rewards ( $F_{(1,31)}=28.72$ ,  $p<0.001$ ; Figure 2A, Table 1).  
129 Variability in punishment magnitude appeared to have the opposite influence on  
130 behavior. When participants were expecting a larger punishment for each incorrect  
131 response, they completed fewer correct trials in a given interval than when they were  
132 expecting smaller punishments ( $F_{(1,31)}=23.11$ ,  $p<0.001$ ; Figure 2B). We also observed a  
133 trending interaction between reward and punishment ( $F_{(1,29)}=3.77$ ,  $p=0.062$ ) whereby  
134 the reward-related improvements in interval-level performance were enhanced in high-  
135 punishment compared to low-punishment intervals.

136

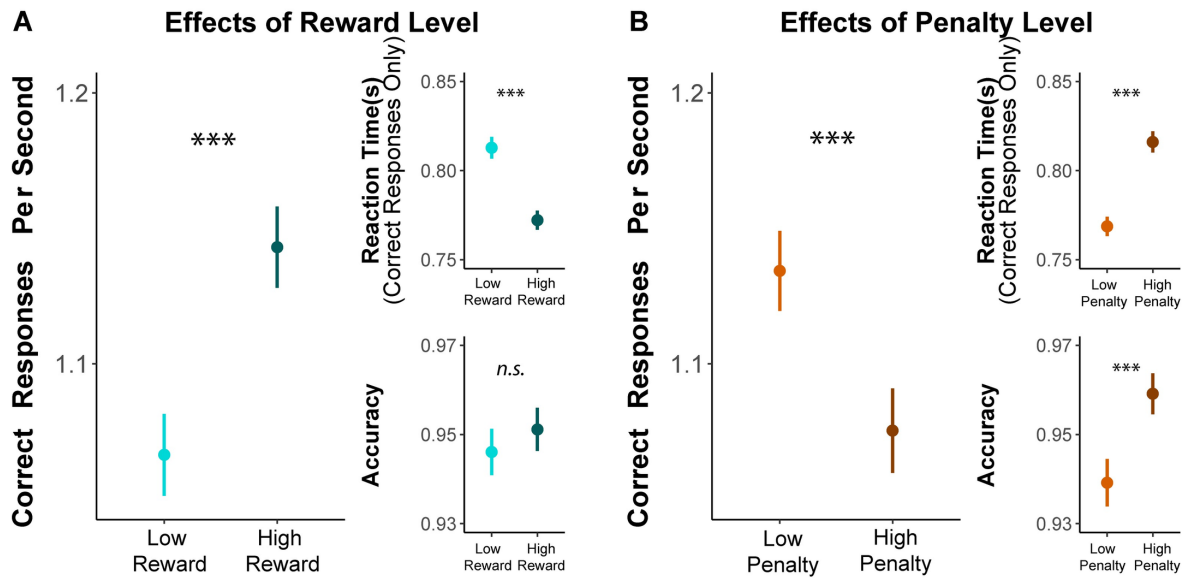

**Figure 2. Effects of reward and punishment on overall task performance. A)** With increasing expected reward, participants completed more correct responses per second within a given interval (**left**), which reflect faster responding on correct trials (**top right**) without any change in overall accuracy (**bottom right**). **B)** With increasing expected punishment, participants instead completed fewer trials per second over an interval, reflecting slower and more accurate responses. Error bars reflect 95% CI. n.s.:  $p > 0.05$ ; \*\*\*:  $p < 0.001$

137

138

139

140

141

142

143

144

145 **Table 1.** Mixed Model Results for Correct Responses per Second

146 \*:  $p < 0.05$ , \*\*:  $p < 0.01$ , \*\*\*:  $p < 0.001$

147

| <b>Correct Responses Per Second</b>                  |                  |             |                     |
|------------------------------------------------------|------------------|-------------|---------------------|
| <i>Predictors</i>                                    | <i>Estimates</i> | <i>S.E.</i> | <i>P-Value</i>      |
| Age                                                  | -0.036           | 0.031       | 0.238               |
| Female - Male                                        | 0.075            | 0.032       | <b>0.020*</b>       |
| High Penalty - Low Penalty                           | -0.026           | 0.005       | <b>&lt;0.001***</b> |
| High Reward - Low Reward                             | 0.038            | 0.007       | <b>&lt;0.001***</b> |
| Average Congruence                                   | -0.015           | 0.005       | <b>0.001**</b>      |
| Reward × Penalty                                     | -0.009           | 0.005       | 0.052               |
| Number of Subjects                                   | 32               |             |                     |
| Observations                                         | 2469             |             |                     |
| Marginal R <sup>2</sup> / Conditional R <sup>2</sup> | 0.093 / 0.551    |             |                     |

148

149 When separately examining how incentives influenced speed and accuracy, we found  
150 an intriguing dissociation that helped account for the inverse effects of reward and  
151 punishment on the number of correct responses per second. We found that larger  
152 potential rewards induced responses that were faster ( $F_{(1,28)}=31.83$ ,  $p < 0.001$ ) but not  
153 more or less accurate ( $Chisq_{(1)}=0.26$ ,  $p=0.612$ ; Figure 2A, Table 2). By contrast, larger  
154 potential punishment induced responses that were slower ( $F_{(1,30)}=35.28$ ,  $p < 0.001$ ) but  
155 *also* more accurate ( $Chisq_{(1)}=26.73$ ,  $p < 0.001$ ; Figure 2B). These results control for trial-  
156 to-trial differences in congruence, which, as expected, revealed faster ( $F_{(1,31)}=115.28$ ,  
157  $p < 0.001$ ) and more accurate ( $Chisq_{(1)}=4.13$ ,  $p=0.042$ ) responses for congruent stimuli  
158 compared to incongruent stimuli. Although there were no significant two-way

159 interactions between incentives and congruency on performance, we observed a  
 160 significant three-way interaction between reward, penalty, and congruence  
 161 ( $Chisq_{(1)}=6.24, p=0.013$ ) specific to accuracy. Together, these data suggest that  
 162 participants applied distinct strategies for engaging cognitive control across reward and  
 163 punishment incentives.

164

165 **Table 2.** Mixed Model Results for Log-Transformed Reaction Time and Accuracy

166 \*:  $p<0.05$ , \*\*:  $p<0.01$ , \*\*\*:  $p<0.001$

167

| <i>Predictors</i>                                    | <b>Log-transformed RT</b> |             |                     | <b>Accuracy</b>    |             |                     |
|------------------------------------------------------|---------------------------|-------------|---------------------|--------------------|-------------|---------------------|
|                                                      | <i>Estimates</i>          | <i>S.E.</i> | <i>P-Value</i>      | <i>Odds Ratios</i> | <i>S.E.</i> | <i>P-Value</i>      |
| Age                                                  | 0.014                     | 0.007       | 0.066               | 0.941              | 0.117       | 0.623               |
| Female - Male                                        | -0.023                    | 0.007       | <b>0.002**</b>      | 1.234              | 0.155       | 0.095               |
| High Penalty - Low Penalty                           | 0.014                     | 0.002       | <b>&lt;0.001***</b> | 1.381              | 0.082       | <b>&lt;0.001***</b> |
| High Reward - Low Reward                             | -0.012                    | 0.002       | <b>&lt;0.001***</b> | 1.028              | 0.039       | 0.464               |
| Trial Congruence (Cong-Incong)                       | -0.020                    | 0.002       | <b>&lt;0.001***</b> | 1.105              | 0.050       | <b>0.028*</b>       |
| Reward × Penalty                                     | -0.003                    | 0.001       | <b>0.015*</b>       | 1.014              | 0.042       | 0.729               |
| Penalty × Congruence                                 | 0.001                     | 0.001       | 0.353               | 1.043              | 0.038       | 0.256               |
| Reward × Congruence                                  | -0.001                    | 0.001       | 0.432               | 1.044              | 0.039       | 0.249               |
| Reward × Penalty × Congruence                        | 0.000                     | 0.001       | 0.543               | 1.097              | 0.041       | <b>0.012*</b>       |
| Number of Subjects                                   | 32                        |             |                     | 32                 |             |                     |
| Observations                                         | 27509                     |             |                     | 28785              |             |                     |
| Marginal R <sup>2</sup> / Conditional R <sup>2</sup> | 0.056 / 0.255             |             |                     | 0.055 / 0.150      |             |                     |

## 168 *Reward Rate-Optimal Control Allocation: Normative Predictions*

169 To generate predictions about performance on the Stroop task, we parameterized the  
170 tasks as a process of noisy evidence accumulating towards one of two boundaries  
171 (correct vs. error), using the *drift diffusion model* (DDM) [34,37]. We hypothesized that  
172 two of the DDM parameters that determine performance on a given trial are the rate of  
173 evidence accumulation (*drift rate*,  $v$ ) and the decision threshold ( $a$ ). As the drift rate  
174 increases, the likelihood of a correct response increases (error rate decreases), and  
175 responses are *faster*. As the threshold increases, responses are also more likely to be  
176 correct but are *slower* (Figure 3A; [31]. As we describe below, a key prediction is that  
177 adjustments in these parameters may underlie divergent strategies for cognitive control  
178 allocation.

179

180 Previous theoretical and empirical work has shown that participants can adjust  
181 parameters of this underlying decision process to maximize the rate at which they are  
182 rewarded over the course of an experiment [31,38]. This reward rate ( $RR$ ) is determined  
183 by a combination of performance metrics (response time and error rate [ $ER$ ], [31]) and  
184 the incentives for performance (i.e., outcomes for correct vs. incorrect responses):

185

$$186 \quad RR = \frac{R \times (1 - ER) - P \times ER}{DT + NDT}$$

187

188 Here, the numerator (expected reward) is determined by the likelihood of a correct  
189 response ( $1 - ER$ ), scaled by the reward for a correct response ( $R$ ), relative to the  
190 likelihood of an error ( $ER$ ), scaled by the associated punishment ( $P$ ) [39]. The

191 denominator (response time) is determined by the time it takes to accumulate evidence  
192 for a decision (decision time [ $DT$ ]) as well as additional time to process stimuli and  
193 execute a motor response (non-decision time [ $NDT$ ]).

194

195 To correctly respond to a Stroop trial (i.e., name stimulus color), participants need to  
196 recruit cognitive control to overcome the automatic tendency to read the word [40,41].  
197 Building on past work [31,38,39], we can use the reward rate formulation above to  
198 identify how participants should normatively allocate control to maximize the reward rate  
199 (Figure 3B-C). To do so, we make three key assumptions. First, we assume that  
200 participants performing our task choose between adjusting two strategies for increasing  
201 their reward rate: (1) increasing attentional focus on the Stroop stimuli (resulting in  
202 increased drift rate toward the correct response), and (2) increasing their threshold to  
203 require more evidence accumulation before responding. Second, we assume that  
204 participants seek to identify the combination of these two DDM parameters that  
205 maximize reward rate. Third, we assume that increasing the drift rate incurs a nonlinear  
206 cost, which participants seek to minimize. The inclusion of this cost term is motivated by  
207 previous psychological and neuroscientific research [1] and by its sheer necessity for  
208 constraining the model from seeking implausibly high values of drift rate (i.e., as this  
209 cost approaches zero, the reward-rate-maximizing drift rate approaches infinity, as  
210 shown in Figure 3B). While a quadratic cost term was chosen a priori based on previous  
211 work [33,42], follow-up analyses (See Supplementary Results 1) indicated that the  
212 predictions made by this quadratic function are also more consistent with our data than  
213 those for a linear (i.e., absolute) function.

214

215

$$RR = \frac{R \times (1 - ER) - P \times ER}{DT + NDT} - E \times v^2$$

216

217 In this formula,  $E$  represents the weight of effort cost. Since the optimal drift rate and

218 threshold are determined by the ratios  $R/E$  and  $P/E$ , the magnitude of effort costs is

219 held constant ( $E = 1$ ) for the reward rate optimization process, putting reward and

220 punishment into units of effort cost. With this modified form of reward rate, the optimal

221 drift rate is well-constrained (Figure 3C).

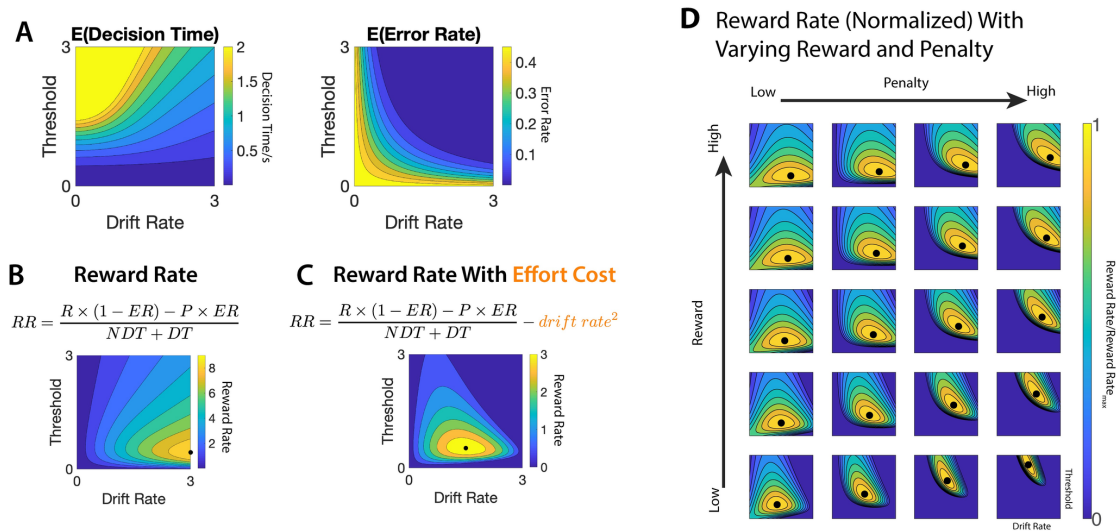

**Figure 3. The influence of DDM parameter settings on estimates of reward rate. A)**

The expected error rate ( $ER$ ) and decision time ( $DT$ ) can be estimated as a function of drift rate and threshold. B-C) Reward rate is traditionally defined as a function of expected error rate, scaled by the value of correct vs. incorrect responses, and the overall response time (the combination of decision time and decision-unrelated processes [31]). The combination of drift rate and threshold settings that maximizes reward rate (black dots) differs depending on whether drift rate is assumed to incur an effort cost or not. Without a cost (B), it is always optimal to maximize drift rate. With a cost (C), drift rate and threshold must both fall within a more constrained set of parameter values. Parameters for (B-C):  $R = 5, P = 5, NDT = 0.4s$ . (D) As the reward for each correct response increases (from 8 to 20), the optimal joint configuration of drift rate and threshold (black dot) moves primarily in the direction of increasing drift rate. As the penalty for an incorrect response increases (from 5 to 625), this optimal configuration moves in the direction of increasing threshold.

222

223 Using this formulation of reward rate ( $RR$ ), we can generate predictions about the  
224 allocation of cognitive control (the combination of drift rate and threshold) that would be  
225 optimal under different reward and punishment conditions. To do so, we varied reward  
226 and punishment values and, for each pair, identified the pair of drift rate and threshold  
227 that would maximize reward rate. As reward increases, the model suggests that the  
228 optimal strategy is to increase the drift rate. As punishment increases, the optimal  
229 strategy is to increase the threshold (Figure 4A). These findings indicate that the  
230 weights for rewards and punishments jointly modulate the optimal strategy for allocating  
231 cognitive control and that these two types of incentives focus on distinct aspects of the  
232 strategy. Specifically, they predict that people will tend to increase drift rate the more



233 they value receiving a reward for a correct response. In contrast, people will adjust their  
234 threshold depending on how much they value receiving a reward for a correct response  
235 (decrease threshold) and receiving a punishment for an incorrect response (increase  
236 threshold).

### 237 *Reward Rate-Optimal Control Allocation: Empirical Evidence*

238 To test whether task performance was consistent with the predictions from our  
239 normative model, we fit behavioral performance on our task (reaction time and  
240 accuracy) with the Hierarchical Drift Diffusion Model (HDDM) package [43]. A  
241 systematic model comparison showed that the best-fitting parameterization of this  
242 model for our task allowed both drift rate and threshold to vary with trial-to-trial  
243 differences in congruency, reward level, and/or penalty level (Figure 4B; also see  
244 Supplementary Results 2). Critically, the parameter estimates from this model were  
245 consistent with predictions of our reward rate-optimal DDM (Figure 4C-E). Consistent  
246 with normative predictions, we found that reward and punishment exhibited dissociable  
247 influences on DDM parameters, such that larger rewards increased drift rate and  
248 decreased threshold, whereas larger punishment promoted a higher threshold. These  
249 findings control for the effect of congruency on DDM parameters (with incongruent trials  
250 being associated with lower drift rate and higher threshold). Taken together, our  
251 empirical findings are consistent with the prediction that participants are optimizing  
252 reward rate, accounting for potential rewards, potential punishments, and effort costs.

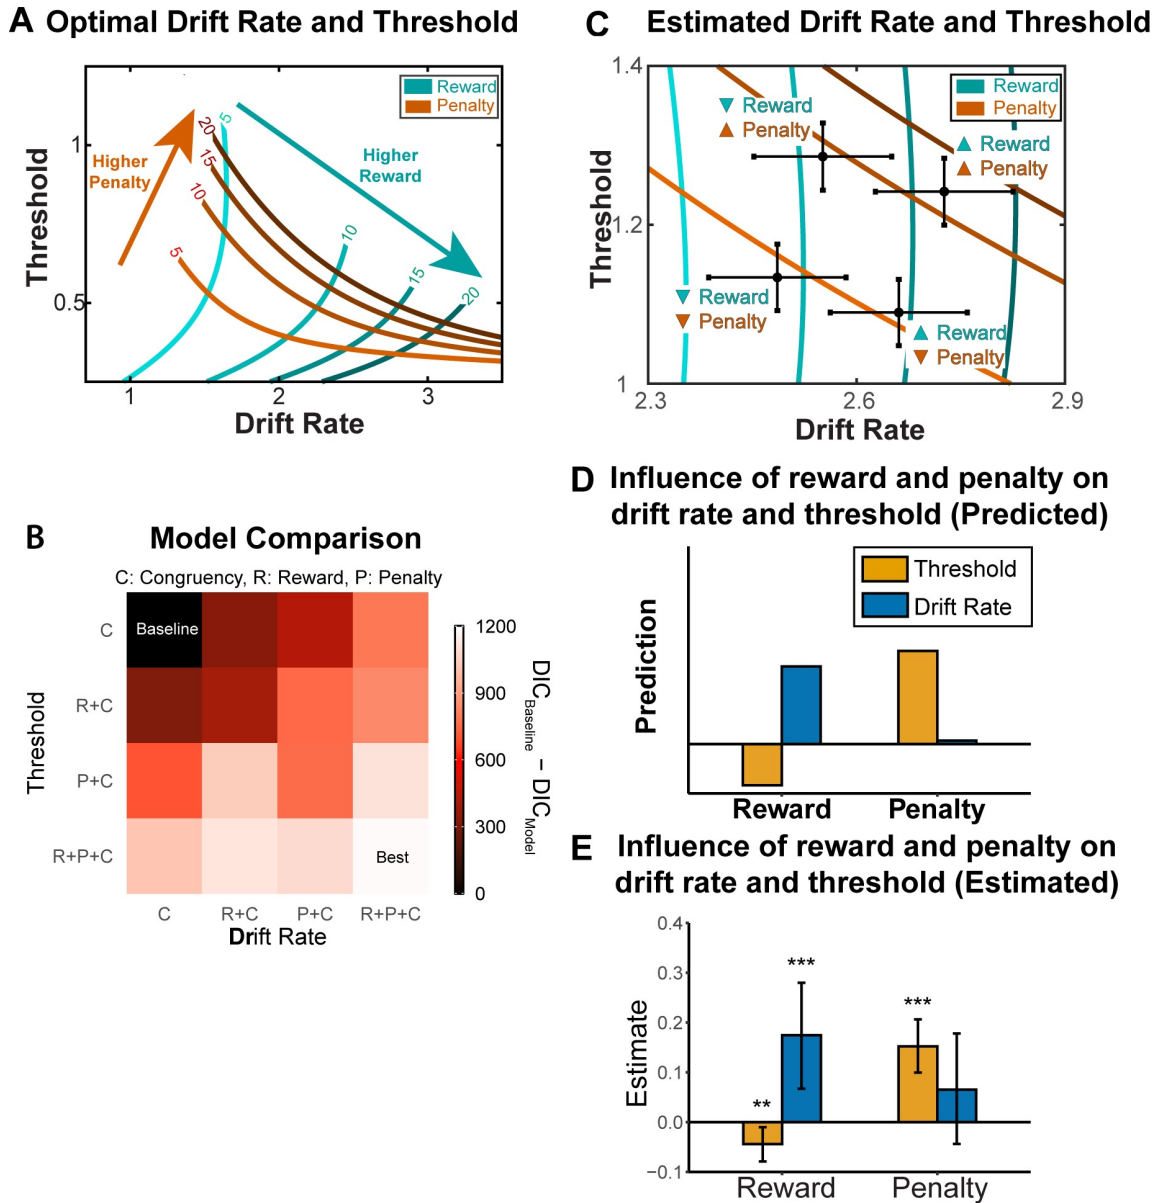

**Figure 4. Normative and empirically observed estimates of incentive effects on DDM parameters. A)** Combinations of drift rate and threshold that optimize (cost-discounted) reward rate, under different values of reward and penalty. **B)** We fit our

behavioral data to different parameterizations of the DDM, with drift rate and/or threshold varying with reward, penalty, and/or congruence levels. The best-fitting model varied both DDM parameters with all three task variables. **C)** Estimated combination of drift rate and threshold for four conditions in the experiment. Error bars reflect s.d. **D-E)** Consistent with predictions based on reward-rate optimization (**D**, cf. panel **A**), we found that larger expected rewards led to increased drift rate, where as larger expected penalties led to increased threshold (**E**, cf. panel **C**). To a lesser extent, we found a decreased threshold with higher expected rewards. Error bars reflect 95% CI. \*:  $p < 0.05$ ; \*\*\*:  $p < 0.001$ . See also Figure S5.

### 253 *Inferring Individual Differences in Sensitivity to Reward and Punishment*

254 Our findings show that performance varies as a function of expected reward and  
255 punishment, and that these performance changes are consistent with a normative  
256 model according to which participants are maximizing reward and minimizing effort  
257 costs. However, both our model predictions and empirical findings also show that  
258 performance alone is insufficient to determine to what extent a participant was driven by  
259 a given incentive. For instance, faster performance could result from a participant being  
260 more sensitive to rewards, less sensitive to penalties, or both. The same is even true for  
261 estimates of individual model parameters within each of these conditions - our model  
262 predicts that a more reward-sensitive participant will lower their threshold than a less  
263 reward-sensitive participant, but that the same would be true for participants less vs.  
264 more sensitive to penalties. However, a key feature of our normative model is that it  
265 predicts how people will *jointly* configure control over drift rate and threshold based on  
266 their expected reward rate in a given condition, and predicts unique *combinations* of

267 these DDM parameters under a given level of expected reward and penalty (Figure 4A).  
268 As a result, we can examine how participants move across this two-dimensional space  
269 as their rewards and penalties vary (Figure 5A), in order to make more robust  
270 inferences about the extent to which their performance was driven by each of these  
271 incentives. In other words, we can “reverse-engineer” how sensitive that participant had  
272 been to the rewards and penalties associated with performance on our task.

273

274 To accomplish this, we used inverse reward-rate optimization to infer the individualized  
275 subjective weights of reward and punishment across the four task conditions based on  
276 participants' estimated DDM parameters. For each task condition, we first estimated the  
277 drift rate ( $v$ ) and threshold ( $a$ ) for each individual. We then calculated the partial  
278 derivatives of reward rate ( $RR$ ) with respect to these condition-specific estimates of  $v$   
279 and  $a$ . By setting these derivatives to 0 (i.e., optimizing the reward-rate equation), we  
280 can calculate the sensitivity to reward and punishment ( $\hat{R}$  and  $\hat{P}$ ) that make the  
281 estimated DDM parameters the optimal strategy (Figure 5C). This workflow can be  
282 summarized as follows:

283

$$284 \quad DDM \rightarrow (\hat{v}, \hat{a}) \rightarrow \begin{cases} \frac{\partial RR(\hat{v}, \hat{a}, R, P)}{\partial \hat{v}} = 0 \\ \frac{\partial RR(\hat{v}, \hat{a}, R, P)}{\partial \hat{a}} = 0 \end{cases} \rightarrow (\hat{R}, \hat{P})$$

285

286 To validate this approach, we simulated DDM parameters under different combinations  
287 of reward and penalty sensitivities ( $R$  and  $P$ ), and tested whether we could recover the  
288 ground-truth parameters based on simulated data. We were able to successfully

289 recover both of these parameters (Supporting Information 5; correlation between  
290 simulated and recovered values:  $r = 0.99$  for  $R$ , and  $r = 0.93$  for  $P$ ), confirming that our  
291 estimation approach can be effective at inferring individual's subjective valuation of  
292 reward and punishment when determining cognitive control adjustments.

293

294 A repeated-measures ANOVA on our estimates of  $R$  and  $P$  (log-transformed) revealed a  
295 main effect of incentive magnitude ( $F_{(1,251)}=12.64$ ,  $p=4.5e-4$ ), with larger  $\hat{R}$  on high-  
296 reward intervals ( $t_{(31)}=4.9$ ,  $p=3.2e-5$ ) and larger  $\hat{P}$  on high-punishment intervals  
297 ( $t_{(31)}=4.72$ ,  $p=4.8e-5$ ). We also observed a main effect of valence, such that estimates of  
298  $\hat{P}$  were higher than estimates of  $\hat{R}$  ( $F_{(1,251)}=603.70$ ,  $p<2e-16$ ). The ANOVA also revealed  
299 a significant interaction between valence and magnitude ( $F_{(1,251)}=7.47$ ,  $p=0.007$ ; see  
300 Figure 5D), such that  $\hat{P}$  estimates differed more across punishment levels than  $\hat{R}$   
301 estimates differed across reward levels. These asymmetric effects of rewards and  
302 punishment on reward rate are consistent with research on loss aversion [44] and error  
303 aversion [45].

304

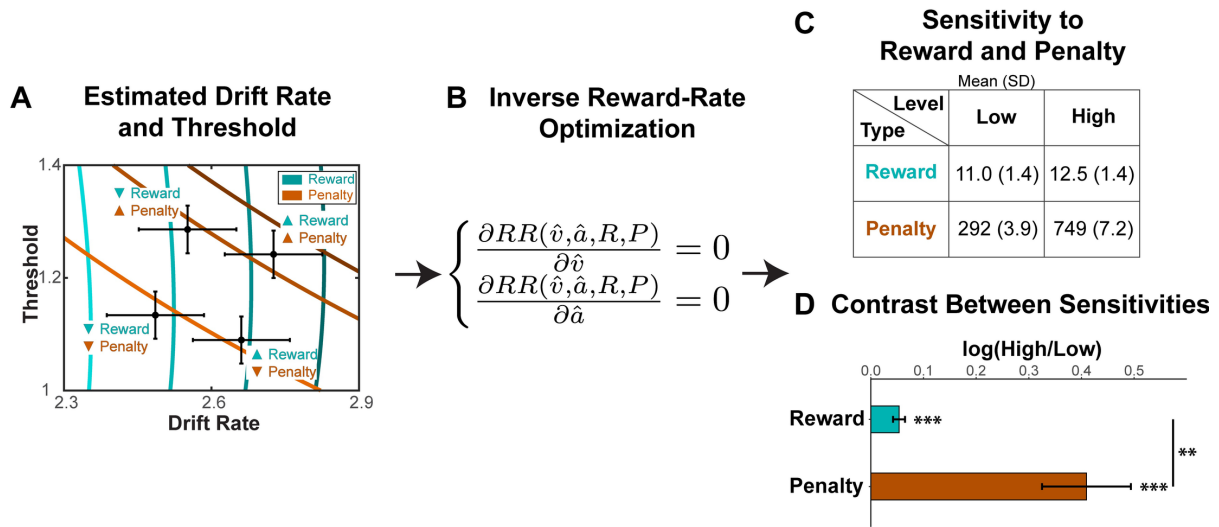

**Figure 5. Inference of sensitivity to reward and penalty based on DDM estimates and reward rate optimization model. A)** Estimated group-level reward-rate optimal combinations of drift rate and threshold for the four conditions in the experiment. Error bars reflect s.d. **B)** To infer the sensitivity to reward and penalty for a given individual, we invert this reward-rate optimization procedure, estimating the set of reward and penalty weights ( $R$  and  $P$ ) that best accounts for that person's pattern of behavior in a given condition. **C-D)** The resulting estimates of sensitivity to reward and penalty recapitulate our experimental manipulation, with higher sensitivity to reward in the high vs. low reward condition, and higher sensitivity to penalty for the high vs. low penalty condition. Panel **C** shows summary statistics across individual participants. Panel **D** shows a summary of individual-level contrasts between sensitivity to high vs. low reward and penalty. Error bars reflect s.e.m. \*\*:  $p < 0.01$ ; \*\*\*:  $p < 0.001$ . Parameter recovery validates subjective weight estimates (see Figure S7).

305 *Replication and extension of Study 1 findings in an independent sample*

306 To verify the robustness of our observed dissociation between reward effects on drift  
307 rate and penalty effects on threshold, we recruited a separate group of participants  
308 (N=65) to perform our task. To further investigate whether these effects generalize  
309 beyond two levels of reward and penalty, we also included an intermediate level of  
310 reward and penalty between the two extremes previously tested. The magnitude of  
311 reward and punishment in each interval was therefore selected independently from  
312 three possible levels: 1 cent (Low), 5 cents (Medium) and 10 cents (High). The selected  
313 reward and punishment are then combined into a cue indicating these incentive levels.

314

315 This second study replicated the dissociable behavioral patterns observed in Study 1.  
316 Consistent with the previous study, we found that participants were faster ( $F_{(2,64)}=13.91$ ,  
317  $p<0.001$ ) but similarly accurate ( $Chisq_{(2)}=2.23$ ,  $p=0.317$ ) with higher levels of reward,  
318 resulting in an overall higher number of correct responses per second as expected  
319 reward increased ( $F_{(2,70)}=12.28$ ,  $p<0.001$ ; Figure 7A). Also consistent with Study 1,  
320 participants were slower ( $F_{(2,63)}=8.49$ ,  $p<0.001$ ) but more accurate ( $Chisq_{(2)}=15.21$ ,  
321  $p<0.001$ ) with higher levels of punishment, resulting in fewer correct responses per  
322 second ( $F_{(2,64)}=4.30$ ,  $p=0.018$ ; Figure 7B). Response rates under Medium levels of  
323 reward and penalty were intermediate to response rates under Low and High levels of  
324 those respective variables.

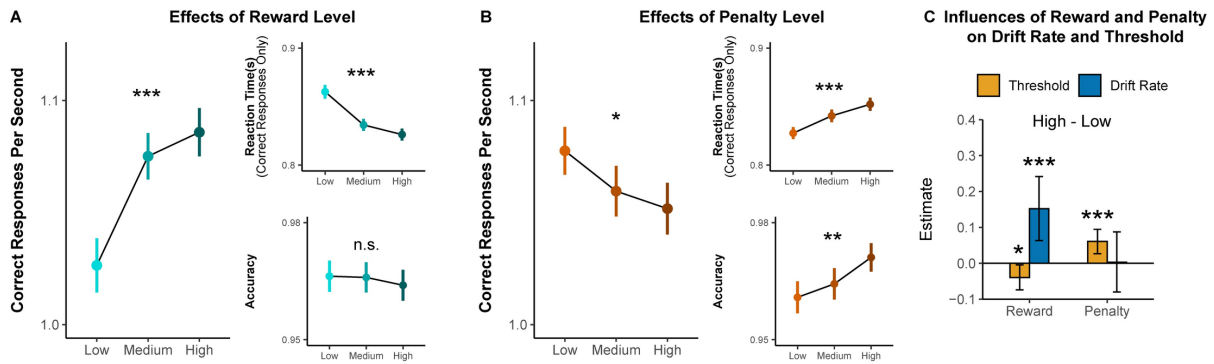

**Figure 6. Effects of reward and punishment on overall task performance (A,B) and parameters of drift diffusion model (C) in Study 2. A)** With increasing expected reward, participants completed more correct responses per second within a given interval (**Left**), which reflect faster responding on correct trials (**top right**) without any change in overall accuracy (**bottom right**). **B)** With increasing expected punishment, participants instead completed fewer trials per second over an interval, reflecting slower and more accurate responses. **C)** Drift rate increases with higher expected reward while threshold increases with higher expected punishment. Error bars reflect 95% CI. n.s.:  $p > 0.05$ ; \*:  $p < 0.05$ ; \*\*:  $p < 0.01$ ; \*\*\*:  $p < 0.001$ .

325

326 When fitting Study 2 data with our best-fitting model from Study 1, we replicate the  
 327 normatively predicted dissociation observed in that study. Reward exerted a significant  
 328 positive influence on drift rate ( $p < 0.001$ ) and negative influence on threshold ( $p = 0.013$ ).  
 329 Penalty exerted a significant positive influence on threshold ( $p = 0.008$ ) but not drift rate  
 330 ( $p = 0.47$ ). These findings are consistent with the predictions from the reward rate  
 331 optimization model.



## 332 **Discussion**

333 We investigated divergent influences of reward versus punishment on cognitive control  
334 allocation, and the normative basis for these incentive-related control adjustments.

335 Participants performed a self-paced cognitive control task that offered the promise of  
336 monetary rewards for correct responses and penalized monetary losses for errors. We  
337 found that higher potential rewards led to faster but equally accurate responding  
338 (resulting in increased monetary earnings), whereas higher potential punishment led to  
339 more accurate but slower responding (thus earning less reward but avoiding  
340 punishment). We showed that these dissociable patterns of incentive-related  
341 performance could be accounted for by two distinct strategies (adjustment of the  
342 strength of attention vs. response threshold), which are differentially optimal (i.e.,  
343 reward rate maximizing) in response to these two types of incentives.

344

345 Our findings build on past research on reward rate maximization that has shown that  
346 people flexibly recruit cognitive control to maximize their subjective reward per unit time  
347 [30,31,35]. Our current experiments build on this research in several important ways.  
348 First, we apply this reward rate optimization model to performance in a self-paced  
349 variant of a cognitive control task. Second, we model and experimentally manipulate the  
350 incentive value for a correct versus incorrect response. Third, we incorporate the well-  
351 known cost of cognitive effort [1,46] into the reward rate optimization model (see below).  
352 Finally, we used our model to perform reverse inference on our data, identifying the  
353 subjective weights of incentives that gave rise to performance on a given trial.

354

355

356 We showed that adjustments of threshold and drift rate can vary as a function of task  
357 incentives, which then drive adaptive adjustments in cognitive control. Notably,  
358 achieving this result required us to build in the assumption that increases in drift rate  
359 incur a cost, an assumption that is grounded in past research on mental effort [1,33]. In  
360 the absence of this cost, our reward rate model predicts that individuals should maintain  
361 a maximal drift rate across incentive conditions, which is inconsistent with our findings.  
362 However, while we have ruled out the possibility that drift rate is costless, the precise  
363 form of its cost function remains an open question. Follow-up simulations show that our  
364 assumed quadratic cost function -- which was motivated by previous research into  
365 cognitive effort discounting [47,48] -- offers a smoother objective function than linear or  
366 exponential alternatives (Figure S3), but all three of these cost functions make  
367 qualitatively similar predictions for our current task. We have also left open the question  
368 of whether and how a cost function applies to increases in response threshold. While  
369 there is reason to believe that threshold adjustments may incur analogous effort costs to  
370 attentional adjustments, in part given the control allocation mechanisms they share  
371 [2,32,34,49–51], threshold adjustments already carry an inherent cost in the form of a  
372 speed-accuracy tradeoff. It therefore wasn't strictly necessary to incorporate an  
373 additional effort cost for threshold in the current simulations (Figure S4), though it is  
374 possible such a cost would provide additional explanatory power under a different task  
375 design. Future work should investigate potential differences in these cost functions  
376 across these and other common control signals.

377

378 While our modified reward rate optimization model was able to accurately characterize  
379 how reward and punishment incentives influenced cognitive control allocation in our  
380 task, a critical next step will be to examine the degree to which these findings  
381 generalize to other tasks and incentive schemes, and to refine the model accordingly.  
382 For instance, in addition to testing the form that different control cost functions take,  
383 future work can clarify how people discount time when optimizing this reward function.  
384 Our model assumes that people discount time in a multiplicative fashion (i.e., as the  
385 denominator for reward), which is a standard assumption in models of reward rate  
386 optimization [31,38]. However, we cannot rule out an alternative possibility that they are  
387 instead discounting time additively, as is assumed by models that treat time as an  
388 opportunity cost of effort [35,52], because these models are likely to make similar  
389 predictions with respect to drift and threshold optimization in our current study.  
390 Identifying and testing tasks that differentiate between these predictions holds value for  
391 bridging these two lines of research in the service of better understanding effort  
392 allocation.

393

394 Another open question is whether people weigh the incentives for a correct response  
395 differently depending on whether these incentives are positive or negative. In our study,  
396 correct responses were only associated with potential rewards (positive reinforcement),  
397 but a key prediction of our model is that people should adjust their control configuration  
398 similarly (i.e., increase drift rate, lower threshold) when correct responses instead avoid  
399 a negative outcome (negative reinforcement), though perhaps to different degrees. Our  
400 approach thus offers promise for disentangling the roles of incentive valence (positive

401 vs. negative) and incentive type (reinforcement vs. punishment) in motivated control  
402 [53].

403

404 More generally, it will be important to test whether similar drift and threshold  
405 adjustments occur across other cognitive control tasks that carry a similar structure to  
406 this one, and to extend our optimization approach to tasks that require different forms  
407 of multivariate control configuration, such as distributing attention across multiple  
408 stimuli or features [54,55]. Broadening the applications of this approach to a wider array  
409 of control signals will also provide a critical step towards understanding how people  
410 distribute their cognitive effort across a multitude of tasks in real-world settings. Along  
411 these lines, a simplifying assumption of our current approach was that people assume  
412 reward rate is constant within a given task environment. While this assumption was  
413 reasonable given the parameters of our task (i.e., where incentives were explicitly cued  
414 and pseudorandomized), a crucial next step will be to examine how people dynamically  
415 reconfigure control as they learn from feedback that the expected rewards and  
416 penalties in their environment are changing. Research has shown that people  
417 dynamically adjust their response threshold in both decision-making tasks [56] and  
418 cognitive control tasks [30,57] as they learn to expect greater rewards. It remains to be  
419 tested how these cognitive control adjustments are distributed across both threshold  
420 and drift rate with changes in both reward and punishment, as well as with individual-  
421 specific [58,59] and context-specific [60] differences in learning from these positive and  
422 negative outcomes.

423

424 Interestingly, research into how people learn differentially from positive versus negative  
425 outcomes is that these learned values also differentially influence a person's  
426 confidence on a given task, with negative feedback resulting in lower confidence in  
427 one's performance on both perceptual and value-based choice tasks [61,62] Given the  
428 connections that have been separately drawn between confidence and adjustments of  
429 response threshold [63,64], these findings converge with our own observations of  
430 increasing threshold in the face of higher expected punishment. Thus, an important  
431 direction for future work will be to examine how metacognitive experiences associated  
432 with our task vary with experienced incentives and potentially serve to moderate  
433 subsequent control adjustments.

434  
435 Finally, our combined theoretical and empirical approach enabled us to quantify  
436 individual differences in how participants subjectively valued expected rewards and  
437 punishments based solely on their task performance. We found that people weighed  
438 punishments more heavily than rewards, despite the equivalent currency (i.e., amounts  
439 of monetary gain vs. loss). This finding is consistent with past work on loss aversion [44]  
440 and motivation to avoid failure [45,65], and more generally, with the findings that distinct  
441 neural circuits are specialized for processing appetitive versus aversive outcomes  
442 [66,67]. While our approach to estimating these individual differences is exploratory and  
443 requires further validation across different tasks and incentive schemes (such as those  
444 noted above), we believe that it holds promise for understanding how people vary in  
445 their motivation to succeed and/or avoid failure in daily life [21,68–72]. Not only can this  
446 method help to infer these sensitivity parameters for a given individual implicitly (i.e.,

447 based on task performance rather than self-report), it can also provide valuable insight  
448 into the cognitive and computational mechanisms that underpin adaptive control  
449 adjustments, and when and how they become maladaptive (e.g., for individuals with  
450 anxiety, depression, or schizophrenia) [73–78].

## 451 **Materials and Methods**

### 452 *Participants*

#### 453 Study 1

454 We collected 36 participants online through Amazon’s Mechanical Turk. We limited the  
455 sample to participants located within the United States, but did not put any other  
456 restrictions on demographics (e.g., race). Participants gave informed written consent  
457 and received cash (\$3 to \$6, depending on their performance and task contingencies)  
458 for participation. The study was approved by Brown University’s Institutional Review  
459 Board.

460

461 4 participants were excluded for either not understanding the task properly (based on  
462 their responses to quiz questions after the instructions) or having mean accuracy below  
463 60% and mean reaction times outside of 3 standard deviations of the mean reaction  
464 time of all the participants. The remaining 32 participants (Gender: 31% Female; Age:  
465 35±10 years) were included in all of our analyses.

466

467

#### 468 Study 2

469 We collected 71 participants online through Amazon's Mechanical Turk. Participants  
470 gave informed written consent and received cash (\$3 to \$6, depending on their  
471 performance and task contingencies) for participation. The study was approved by  
472 Brown University's Institutional Review Board.

473

474 6 participants were excluded for either not understanding the task properly (based on  
475 their responses to quiz questions after the instructions) or having mean accuracy below  
476 60% and mean reaction times outside of 3 standard deviations of the mean reaction  
477 time of all the participants. The remaining 65 participants (Gender: 45% Female; Age:  
478  $38 \pm 9$  years) were included in all of our analyses.

#### 479 *Incentivized Cognitive Control Task*

##### 480 Study 1

481 We designed a new task to investigate cognitive control allocation in a self-paced  
482 environment (Figure 1). During this task, participants are given fixed time intervals (e.g.,  
483 10 seconds) to perform a cognitively demanding task (Stroop task), in which they have  
484 to name the ink color of a color word. There were four possible ink colors (red, yellow,  
485 green and blue) across four possible color words ('RED', 'YELLOW', 'GREEN', 'BLUE').  
486 Participants were instructed to press the key corresponding to the ink color of each  
487 stimulus. The ink color could be congruent (e.g., BLUE) or incongruent (e.g., BLUE)  
488 with the meaning of the word. Responding to incongruent stimuli has been shown to  
489 require an override of their more automatic tendency to respond based on the word  
490 meaning. The overall ratio of congruent versus incongruent trials was 1:1. Participants  
491 could perform as many Stroop trials as they wanted and were able during each interval,

492 with a new trial appearing immediately after each response. Due to this self-paced  
493 design, the proportion of congruent trials could vary slightly across intervals. To  
494 discourage participants from developing a trial-counting strategy (e.g., aiming to  
495 complete 10 responses per interval), the duration of intervals varied across the session  
496 (i.e., ranging from 8 to 12 seconds).

497

498 Participants were instructed that they would be rewarded for correct responses and  
499 penalized for incorrect responses. At the start of each interval, a visual cue indicated the  
500 level of reward and punishment associated with their responses in the subsequent  
501 interval. We varied reward for correct responses (+1 cent or +10 cents) and punishment  
502 for incorrect responses (-1 cent or -10 cents) within each subject, which leads to four  
503 distinct conditions (Figure 1). Each participant performed 20 intervals per condition.  
504 During the interval, participants could complete as many Stroop trials as they would like.  
505 Below each Stroop stimulus, a tracker indicated the cumulative amount of monetary  
506 reward within that interval. After each interval, participants were informed how much  
507 they earned. To ensure that each interval was evaluated independently, participants  
508 were informed (veridically) that 8 out of the 80 intervals in the main task were randomly  
509 selected and the total money earned in these selected intervals would be part of their  
510 final payment. The experiment was implemented within the PsiTurk framework [79].

511

512 Before the main task, participants performed several practice sessions. First, they  
513 practiced the mapping between keyboard keys and colors (80 trials). Then they  
514 completed practice for the Stroop task (60 trials). Participants then practiced the Stroop



515 task in the self-paced setting (4 intervals). In a final practice block, participants were  
516 introduced to the visual cues and practiced the self-paced intervals with these visual  
517 cues (12 intervals).

518

## 519 Study 2

520 The task in Study 2 has a similar structure compared to Study 1. The major difference  
521 between tasks was that the magnitude of reward and penalty was selected from three  
522 possible levels (1 cent, 5 cents and 10 cents) instead of binary levels in Study 1, such  
523 that there exist 9 distinct conditions in the experiment (3 levels of reward by 3 levels of  
524 punishment, Figure 6). Same with Study 1, the condition was cued prior to the start of  
525 each interval.

## 526 Analyses

### 527 Study 1

528 With this paradigm, we can analyze performance at the level of a given interval and at  
529 the level of responses to individual Stroop stimuli within that interval. We analyzed  
530 participants' interval-level performance by fitting a linear mixed model (lme4 package in  
531 R; [80]) to estimate the correct responses per second as a function of contrast-coded  
532 reward and punishment levels (High Reward = 1, Low Reward = -1, High Punishment  
533 =1, Low Punishment = -1) as well as their interaction. The models controlled for age,  
534 gender, and proportion of congruent stimuli, and using models with maximally specified  
535 random effects [81].

536  $Correct/second \sim age + gender + reward * penalty + mean congruence$

537 To understand how the incentive effects on overall performance are composed of the  
538 influences on speed and accuracy, we separately fit linear mixed models to trial-wise  
539 reaction time (correct responses only) and accuracy, controlling for the stimuli  
540 congruency. We performed analysis of variance on the fitted mixed models to test the  
541 overall effects of reward and punishment.

542  $\log(RT \text{ for correct response}) \sim age + gender + reward * penalty * congruence$

543  $Accuracy \sim \text{logit}(age + gender + reward * penalty * congruence)$

544 We parameterized participants' responses in the task as a process of noisy evidence  
545 accumulating towards one of two boundaries (correct vs. error) using the Drift Diffusion  
546 Model (DDM). The DDM is a mechanistic model of decision-making that decomposes  
547 choices into a set of constituent processes (e.g., evidence accumulation and response  
548 thresholding), allowing precise measurement of how different components of the choice  
549 process (e.g., RT and accuracy) are simultaneously optimized [37]. We performed  
550 hierarchical fitting of DDM parameters using the HDDM package [43]. In the DDM  
551 model, the drift rate and threshold depend on trial type (congruent or incongruent),  
552 reward level and/or penalty level. The selection of predictors for drift rate and threshold  
553 is based on the model comparison using DIC. We fixed the starting point at the mid-  
554 point between the two boundaries as there was no prior bias toward a specific response  
555 in the task. The non-decision time was fitted as a free parameter.

556

557 We characterized the optimal allocation of cognitive control as the maximization of the  
558 reward rate [31] with modification for effort cost. Based on qualitative comparisons  
559 between predictions of different cost functions (Figures S3-S4), we chose to express

560 these cost functions as a quadratic function of drift rate and to assume no cost on  
561 increases in threshold, but note that alternate formats of each of these cost functions  
562 yield qualitatively similar predictions for all of our key findings (see Supporting  
563 Information 2). With the effort-discounted reward rate, we make predictions about the  
564 influences of incentives on control allocation by numerically identifying the optimal drift  
565 rate and threshold under varying reward and punishment. To validate our normative  
566 prediction, we fit accuracies and RTs across the different task conditions with a DDM  
567 [43], which allowed us to derive estimates of how a participant's drift rate and threshold  
568 varied across different levels of reward and punishment. We performed model  
569 comparison based on deviance information criterion (DIC; lower is better) to identify the  
570 best model for the behavioral data. Based on the assumption that participants' cognitive  
571 control allocation optimizes the reward rate, we inferred participants' subjective weights  
572 of reward and punishment from the estimated drift rate and threshold.

573

## 574 Study 2

575 We performed linear mixed model analysis on the participants' interval-level  
576 performance with reward and punishment levels coded with sliding-difference contrast  
577 so that the two contrasts represent the difference between two consecutive reward or  
578 punishment levels (Medium - Low, High - Medium). We separately fit linear mixed  
579 models to trial-wise reaction time (correct responses only) and accuracy, controlling for  
580 the stimuli congruency.

581

582 We fit participants' responses with the DDM using three-level polynomial contrast  
583 coding to obtain the linear and nonlinear patterns of incentive effects on DDM  
584 parameters. The coefficients in these contrasts were then transformed back to the DDM  
585 parameters under each condition.

586

587 All human data are available on OSF at link <https://osf.io/24ud5/>.

588 All code written in support of this publication is publicly available at

589 <https://github.com/Jasonleng/RewardPenaltyPaper>.

590

## 591 **Acknowledgments**

592 This work was funded by the Training Program for Interactionist Cognitive Neuroscience  
593 T32-MH115895 (X.L.), Training Program for Computational Psychiatry T32-MH126388  
594 (D.Y.), an Innovation Award (A.S.) and a Daniel Cooper Graduate Student Fellowship  
595 (H.R.) from Brown's Carney Institute for Brain Science; and by grants from the National  
596 Institute of General Medical Sciences (P20GM103645) and the National Science  
597 Foundation (CAREER Award 2046111) to A.S.

598

## 599 **Competing Interests**

600 The authors have no competing interests to declare.

601 **References**

602

603 1. Shenhav A, Musslick S, Lieder F, Kool W, Griffiths TL, Cohen JD, et al. Toward a Rational  
604 and Mechanistic Account of Mental Effort. *Annu Rev Neurosci.* 2017;40: 99–124.

605 2. Shenhav A, Botvinick MM, Cohen JD. The expected value of control: an integrative theory  
606 of anterior cingulate cortex function. *Neuron.* 2013;79: 217–240.

607 3. Lewin K. *A dynamic theory of personality* (DK Adams & KE Zener, Trans.). New York, NY,  
608 US: McGraw-Hill. 1935.

609 4. Atkinson JW, Feather NT, Others. *A theory of achievement motivation.* Wiley New York;  
610 1966.

611 5. Botvinick M, Braver T. Motivation and cognitive control: from behavior to neural  
612 mechanism. *Annu Rev Psychol.* 2015;66: 83–113.

613 6. Wrosch C, Scheier MF, Carver CS, Schulz R. The Importance of Goal Disengagement in  
614 Adaptive Self-Regulation: When Giving Up is Beneficial. *Self and Identity.* 2003. pp. 1–20.

615 7. Meyniel F, Sergent C, Rigoux L, Daunizeau J, Pessiglione M. Neurocomputational account  
616 of how the human brain decides when to have a break. *Proc Natl Acad Sci U S A.*  
617 2013;110: 2641–2646.

618 8. Yee DM, Braver TS. Interactions of motivation and cognitive control. *Current Opinion in*  
619 *Behavioral Sciences.* 2018. pp. 83–90.

620 9. Parro C, Dixon ML, Christoff K. The neural basis of motivational influences on cognitive  
621 control. *Hum Brain Mapp.* 2018;39: 5097–5111.

- 622 10. Braver TS, Krug MK, Chiew KS, Kool W, Westbrook JA, Clement NJ, et al. Mechanisms of  
623 motivation--cognition interaction: challenges and opportunities. *Cogn Affect Behav*  
624 *Neurosci.* 2014;14: 443–472.
- 625 11. Krebs RM, Boehler CN, Woldorff MG. The influence of reward associations on conflict  
626 processing in the Stroop task. *Cognition.* 2010;117: 341–347.
- 627 12. Cools R. The cost of dopamine for dynamic cognitive control. *Current Opinion in Behavioral*  
628 *Sciences.* 2015;4: 152–159.
- 629 13. Vassena E, Silvetti M, Boehler CN, Achten E, Fias W, Verguts T. Overlapping neural  
630 systems represent cognitive effort and reward anticipation. *PLoS One.* 2014;9: e91008.
- 631 14. Padmala S, Pessoa L. Reward reduces conflict by enhancing attentional control and  
632 biasing visual cortical processing. *J Cogn Neurosci.* 2011;23: 3419–3432.
- 633 15. Chiew KS, Braver TS. Reward favors the prepared: Incentive and task-informative cues  
634 interact to enhance attentional control. *J Exp Psychol Hum Percept Perform.* 2016;42: 52–  
635 66.
- 636 16. Hefer C, Dreisbach G. How performance-contingent reward prospect modulates cognitive  
637 control: Increased cue maintenance at the cost of decreased flexibility. *J Exp Psychol Learn*  
638 *Mem Cogn.* 2017;43: 1643–1658.
- 639 17. Frömer R, Lin H, Dean Wolf CK, Inzlicht M, Shenhav A. Expectations of reward and  
640 efficacy guide cognitive control allocation. *Nat Commun.* 2021;12: 1030.
- 641 18. Cubillo A, Makwana AB, Hare TA. Differential modulation of cognitive control networks by  
642 monetary reward and punishment. *Soc Cogn Affect Neurosci.* 2019;14: 305–317.
- 643 19. Yamaguchi M, Nishimura A. Modulating proactive cognitive control by reward: differential

- 644 anticipatory effects of performance-contingent and non-contingent rewards. *Psychol Res.*  
645 2019;83: 258–274.
- 646 20. Yee DM, Krug MK, Allen AZ, Braver TS. Humans Integrate Monetary and Liquid Incentives  
647 to Motivate Cognitive Task Performance. *Front Psychol.* 2016;6: 2037.
- 648 21. Braem S, Duthoo W, Notebaert W. Punishment sensitivity predicts the impact of  
649 punishment on cognitive control. *PLoS One.* 2013;8: e74106.
- 650 22. Yee DM, Crawford JL, Lamichhane B, Braver TS. Dorsal Anterior Cingulate Cortex  
651 Encodes the Integrated Incentive Motivational Value of Cognitive Task Performance. *J*  
652 *Neurosci.* 2021;41: 3707–3720.
- 653 23. Church RM. THE VARIED EFFECTS OF PUNISHMENT ON BEHAVIOR. *Psychol Rev.*  
654 1963;70: 369–402.
- 655 24. van Veen V, Krug MK, Carter CS. The neural and computational basis of controlled speed-  
656 accuracy tradeoff during task performance. *J Cogn Neurosci.* 2008;20: 1952–1965.
- 657 25. Danielmeier C, Ullsperger M. Post-error adjustments. *Front Psychol.* 2011;2: 233.
- 658 26. Ritz H, DeGutis J, Frank MJ, Esterman M, Shenhav A. An evidence accumulation model of  
659 motivational and developmental influences over sustained attention. 42nd Annual Meeting  
660 of the Cognitive Science Society. 2020.
- 661 27. Ritz H, Shenhav A. Parametric control of distractor-oriented attention. 41st Annual Meeting  
662 of the Cognitive Science Society. 2019.
- 663 28. Niv Y, Daw ND, Joel D, Dayan P. Tonic dopamine: opportunity costs and the control of  
664 response vigor. *Psychopharmacology* . 2007;191: 507–520.

- 665 29. Boureau Y-L, Dayan P. Opponency revisited: competition and cooperation between  
666 dopamine and serotonin. *Neuropsychopharmacology*. 2011;36: 74–97.
- 667 30. Otto AR, Daw ND. The opportunity cost of time modulates cognitive effort.  
668 *Neuropsychologia*. 2019;123: 92–105.
- 669 31. Bogacz R, Brown E, Moehlis J, Holmes P, Cohen JD. The physics of optimal decision  
670 making: a formal analysis of models of performance in two-alternative forced-choice tasks.  
671 *Psychol Rev*. 2006;113: 700–765.
- 672 32. Shenhav A, Cohen JD, Botvinick MM. Dorsal anterior cingulate cortex and the value of  
673 control. *Nat Neurosci*. 2016;19: 1286–1291.
- 674 33. Manohar SG, Chong TT-J, Apps MAJ, Batla A, Stamelou M, Jarman PR, et al. Reward  
675 Pays the Cost of Noise Reduction in Motor and Cognitive Control. *Curr Biol*. 2015;25:  
676 1707–1716.
- 677 34. Musslick S, Shenhav A, Botvinick MM, Cohen JD. A computational model of control  
678 allocation based on the expected value of control. The 2nd multidisciplinary conference on  
679 reinforcement learning and decision making. 2015.
- 680 35. Lieder F, Shenhav A, Musslick S, Griffiths TL. Rational metareasoning and the plasticity of  
681 cognitive control. *PLoS Comput Biol*. 2018;14: e1006043.
- 682 36. Schmidt L, Lebreton M, Cléry-Melin M-L, Daunizeau J, Pessiglione M. Neural mechanisms  
683 underlying motivation of mental versus physical effort. *PLoS Biol*. 2012;10: e1001266.
- 684 37. Ratcliff R, McKoon G. The diffusion decision model: theory and data for two-choice decision  
685 tasks. *Neural Comput*. 2008;20: 873–922.
- 686 38. Simen P, Contreras D, Buck C, Hu P, Holmes P, Cohen JD. Reward rate optimization in



- 687 two-alternative decision making: empirical tests of theoretical predictions. *J Exp Psychol*  
688 *Hum Percept Perform.* 2009;35: 1865–1897.
- 689 39. Krueger PM, van Vugt MK, Simen P, Nystrom L, Holmes P, Cohen JD. Evidence  
690 accumulation detected in BOLD signal using slow perceptual decision making. *J Neurosci*  
691 *Methods.* 2017;281: 21–32.
- 692 40. Cohen JD, Dunbar K, McClelland JL. On the control of automatic processes: a parallel  
693 distributed processing account of the Stroop effect. *Psychol Rev.* 1990;97: 332–361.
- 694 41. Bugg JM. Dissociating Levels of Cognitive Control: The Case of Stroop Interference. *Curr*  
695 *Dir Psychol Sci.* 2012;21: 302–309.
- 696 42. Diedrichsen J, Shadmehr R, Ivry RB. The coordination of movement: optimal feedback  
697 control and beyond. *Trends Cogn Sci.* 2010;14: 31–39.
- 698 43. Wiecki TV, Sofer I, Frank MJ. HDDM: Hierarchical Bayesian estimation of the Drift-Diffusion  
699 Model in Python. *Front Neuroinform.* 2013;7: 14.
- 700 44. Kahneman D, Tversky A. Prospect Theory: An Analysis of Decision under Risk.  
701 *Econometrica.* 1979;47: 263–291.
- 702 45. Hajcak G, Foti D. Errors Are Aversive. *Psychological Science.* 2008. pp. 103–108.
- 703 46. Westbrook A, Kester D, Braver TS. What is the subjective cost of cognitive effort? Load,  
704 trait, and aging effects revealed by economic preference. *PLoS One.* 2013;8: e68210.
- 705 47. Westbrook A, Braver TS. Cognitive effort: A neuroeconomic approach. *Cogn Affect Behav*  
706 *Neurosci.* 2015;15: 395–415.
- 707 48. Crawford JL, Eisenstein SA, Peelle JE, Braver TS. Domain-general cognitive motivation:

- 708 evidence from economic decision-making. *Cogn Res Princ Implic*. 2021;6: 4.
- 709 49. Danielmeier C, Eichele T, Forstmann BU, Tittgemeyer M, Ullsperger M. Posterior medial  
710 frontal cortex activity predicts post-error adaptations in task-related visual and motor areas.  
711 *J Neurosci*. 2011;31: 1780–1789.
- 712 50. King JA, Korb FM, von Cramon DY, Ullsperger M. Post-error behavioral adjustments are  
713 facilitated by activation and suppression of task-relevant and task-irrelevant information  
714 processing. *J Neurosci*. 2010;30: 12759–12769.
- 715 51. van Maanen L, Brown SD, Eichele T, Wagenmakers E-J, Ho T, Serences J, et al. Neural  
716 Correlates of Trial-to-Trial Fluctuations in Response Caution. *J Neurosci*. 2011. pp. 17488–  
717 17495.
- 718 52. Kurzban R, Duckworth A, Kable JW, Myers J. An opportunity cost model of subjective effort  
719 and task performance. *Behav Brain Sci*. 2013;36: 661–679.
- 720 53. Yee D, Leng X, Shenhav A, Braver T. Aversive Motivation and Cognitive Control: Neural,  
721 Monoaminergic, and Computational Mechanisms. *PsyArXiv*. 2021.  
722 <https://psyarxiv.com/tejsk/download?format=pdf>
- 723 54. Ritz H, Leng X, Shenhav A. Cognitive control as a multivariate optimization problem. *arXiv*  
724 [q-bio.NC]. 2021. <http://arxiv.org/abs/2110.00668>
- 725 55. Ritz H, Shenhav A. Humans reconfigure target and distractor processing to address distinct  
726 task demands. *bioRxiv*. 2021.  
727 <https://www.biorxiv.org/content/10.1101/2021.09.08.459546.abstract>
- 728 56. Fontanesi L, Gluth S, Spektor MS, Rieskamp J. A reinforcement learning diffusion decision  
729 model for value-based decisions. *Psychon Bull Rev*. 2019;26: 1099–1121.

- 730 57. Devine S, Neumann C, Otto AR, Bolenz F, Reiter AMF, Eppinger B. Seizing the  
731 opportunity: Lifespan differences in the effects of the opportunity cost of time on cognitive  
732 control. *PsyArXiv*. 2021. doi:10.31234/osf.io/xp6kh
- 733 58. Rosenbaum G, Grassie H, Hartley CA. Valence biases in reinforcement learning shift  
734 across adolescence and modulate subsequent memory. *PsyArXiv*. 2020.  
735 doi:10.31234/osf.io/n3vsv
- 736 59. Raab HA, Hartley CA. Adolescents exhibit reduced Pavlovian biases on instrumental  
737 learning. *Sci Rep*. 2020;10: 15770.
- 738 60. Palminteri S, Lebreton M. Context-dependent outcome encoding in human reinforcement  
739 learning. *Curr Opin Behav Sci*. 2021;41: 144–151.
- 740 61. Lebreton M, Langdon S, Slieker MJ, Nooitgedacht JS, Goudriaan AE, Denys D, et al. Two  
741 sides of the same coin: Monetary incentives concurrently improve and bias confidence  
742 judgments. *Sci Adv*. 2018;4: eaaq0668.
- 743 62. Lebreton M, Bacily K, Palminteri S, Engelmann JB. Contextual influence on confidence  
744 judgments in human reinforcement learning. *PLoS Comput Biol*. 2019;15: e1006973.
- 745 63. Boldt A, Schiffer A-M, Waszak F, Yeung N. Confidence Predictions Affect Performance  
746 Confidence and Neural Preparation in Perceptual Decision Making. *Sci Rep*. 2019;9: 4031.
- 747 64. Desender K, Boldt A, Verguts T, Donner TH. Confidence predicts speed-accuracy tradeoff  
748 for subsequent decisions. *Elife*. 2019;8.
- 749 65. Atkinson JW. Motivational determinants of risk-taking behavior. *Psychol Rev*. 1957;64, Part  
750 1: 359–372.
- 751 66. Bissonette GB, Gentry RN, Padmala S, Pessoa L, Roesch MR. Impact of appetitive and

- 752       aversive outcomes on brain responses: linking the animal and human literatures. *Front Syst*  
753       *Neurosci.* 2014;8: 24.
- 754   67. Pessiglione M, Delgado MR. The good, the bad and the brain: Neural correlates of  
755       appetitive and aversive values underlying decision making. *Curr Opin Behav Sci.* 2015;5:  
756       78–84.
- 757   68. McNaughton N, Gray JA. Anxiolytic action on the behavioural inhibition system implies  
758       multiple types of arousal contribute to anxiety. *J Affect Disord.* 2000;61: 161–176.
- 759   69. Kim SH, Yoon H, Kim H, Hamann S. Individual differences in sensitivity to reward and  
760       punishment and neural activity during reward and avoidance learning. *Soc Cogn Affect*  
761       *Neurosci.* 2015;10: 1219–1227.
- 762   70. Locke HS, Braver TS. Motivational influences on cognitive control: behavior, brain  
763       activation, and individual differences. *Cogn Affect Behav Neurosci.* 2008;8: 99–112.
- 764   71. Froböse MI, Swart JC, Cook JL, Geurts DEM, den Ouden HEM, Cools R.  
765       Catecholaminergic modulation of the avoidance of cognitive control. *Journal of*  
766       *Experimental Psychology: General.* 2018. pp. 1763–1781.
- 767   72. Boksem MAS, Tops M, Wester AE, Meijman TF, Lorist MM. Error-related ERP components  
768       and individual differences in punishment and reward sensitivity. *Brain Res.* 2006;1101: 92–  
769       101.
- 770   73. Cavanagh JF, Shackman AJ. Frontal midline theta reflects anxiety and cognitive control:  
771       meta-analytic evidence. *J Physiol Paris.* 2015;109: 3–15.
- 772   74. Grahek I, Shenhav A, Musslick S, Krebs RM, Koster EHW. Motivation and cognitive control  
773       in depression. *Neurosci Biobehav Rev.* 2019;102: 371–381.

- 774 75. Paulus MP. Cognitive control in depression and anxiety: out of control? *Current Opinion in*  
775 *Behavioral Sciences*. 2015;1: 113–120.
- 776 76. Huang H, Movellan J, Paulus MP, Harlé KM. The Influence of Depression on Cognitive  
777 Control: Disambiguating Approach and Avoidance Tendencies. *PLoS One*. 2015;10:  
778 e0143714.
- 779 77. Joormann J, Vanderlind WM. Emotion Regulation in Depression: The Role of Biased  
780 Cognition and Reduced Cognitive Control. *Clin Psychol Sci*. 2014;2: 402–421.
- 781 78. Barch DM, Sheffield JM. Cognitive control in schizophrenia: Psychological and neural  
782 mechanisms. In: Egner T, editor. *The Wiley handbook of cognitive control*, pp. 2017. pp.  
783 556–580.
- 784 79. Gureckis TM, Martin J, McDonnell J, Rich AS, Markant D, Coenen A, et al. psiTurk: An  
785 open-source framework for conducting replicable behavioral experiments online. *Behav*  
786 *Res Methods*. 2016;48: 829–842.
- 787 80. Bates D, Mächler M, Bolker B, Walker S. Fitting Linear Mixed-Effects Models Using lme4.  
788 *Journal of Statistical Software, Articles*. 2015;67: 1–48.
- 789 81. Barr DJ, Levy R, Scheepers C, Tily HJ. Random effects structure for confirmatory  
790 hypothesis testing: Keep it maximal. *J Mem Lang*. 2013;68.
